1 **Comparative physiology of five tropical montane songbirds reveals differential seasonal**  
2 **acclimatisation and cold adaption**

3 SAMUEL E.I. JONES<sup>1,2,\*</sup>, MARTIN SUANJAK<sup>3</sup>, JOSEPH A. TOBIAS<sup>4</sup>, ROBIN  
4 FREEMAN<sup>2</sup> & STEVEN J. PORTUGAL<sup>1</sup>

5 *<sup>1</sup> Department of Biological Sciences, School of Life and Environmental Sciences, Royal*  
6 *Holloway University of London, Egham, Surrey TW20 0EX*

7 *<sup>2</sup> Institute of Zoology, Zoological Society of London, Regents Park, London NW1 4RY*

8 *<sup>3</sup> Department of Tropical Ecology and Animal Biodiversity, University of Vienna,*  
9 *Universitätsring 1, 1010 Wien, Vienna, Austria*

10 *<sup>4</sup> Department of Life Sciences, Imperial College London, Silwood Park, Buckhurst Road,*  
11 *Ascot, Berkshire SL5 7PY*

12 *\*corresponding author; [samuel.jones.2016@live.rhul.ac.uk](mailto:samuel.jones.2016@live.rhul.ac.uk)*

13

## 14 **Abstract**

15           The physiology of tropical birds is poorly understood, particularly in how it relates to  
16 local climate and changes between seasons. This is particularly true of tropical montane  
17 species, which may have sensitive thermal tolerances to local microclimates. We studied  
18 metabolic rates (using open flow respirometry), body mass and haemoglobin concentrations  
19 of five sedentary Mesoamerican songbirds between the summer and winter at two elevations  
20 (1550 m and 1950 m, respectively). We asked whether there were uniform seasonal shifts in  
21 physiological traits across species, and whether higher elevation species displayed evidence  
22 for cold tolerance. Seasonal shifts in metabolic rates differed between the three species for  
23 which data were collected. Basal metabolic rates in one species – black-headed nightingale-  
24 thrushes *Catharus mexicanus* – were up-regulated in summer (~19% increase of winter  
25 metabolism), however two other species displayed no seasonal regulation. No species  
26 exhibited shifts in haemoglobin concentrations across season or across elevation, whereas  
27 body mass in two species was significantly higher in the summer. One species restricted to  
28 higher elevations – ruddy-capped nightingale-thrushes *C. frantzii* – displayed physiological  
29 traits indicative of cold-tolerance. Although only summer data were available for this species  
30 (*C. frantzii*), metabolic rates were constant across temperatures tested (5-34°C) and  
31 haemoglobin concentrations were significantly higher compared to the other four species. Our  
32 results suggest that seasonal acclimatisation in physiological traits is variable between species  
33 and appear unrelated to changes in local climate. As such, the distinct physiological traits  
34 observed in ruddy-capped nightingale-thrushes likely relate to historic isolation and  
35 conserved physiological traits rather than contemporary climatic adaption.

36 **Keywords:** avian metabolism, elevational range, pace of life, phenotypic flexibility,  
37 thermoregulation

## 38 **Introduction**

39           Physiological acclimatisation, where the physiological characteristics of a species are  
40 shaped by local climate, is intrinsic to an organisms ability to survive in changeable  
41 environments (Chown *et al.* 2004, Bozinovic *et al.* 2011). In birds, non-migratory species are  
42 frequently used to investigate such physiological shifts, due to the temperature extremes they  
43 typically experience throughout the duration of the annual cycle (McKechnie 2007, Swanson  
44 2010). Consistent physiological acclimatisation to cold winter temperatures have been  
45 displayed in resident high-latitude birds, such as winter increases in basal and peak metabolic  
46 rates (BMR/PMR; the lower and upper limits of metabolic power output, respectively) and  
47 body mass ( $M_b$ ), reflecting the increased energetic demands of maintaining high internal body  
48 temperatures (McKechnie 2007, McKechnie & Swanson 2010, Smit & McKechnie 2010,  
49 McKechnie *et al.* 2015). However, while the general patterns of physiological acclimatisation  
50 to cooler climates are relatively well established in temperate birds (Swanson 2010), much  
51 less is known in lower latitude species.

52           How avian physiology relates to the environmental conditions in tropical latitudes is  
53 poorly understood, and is largely restricted to studies in warm tropical lowlands (Pollock *et al.*  
54 *et al.* 2019). Tropical birds have lower metabolic rates compared to those of temperate species  
55 (Wiersma *et al.* 2007, Londoño *et al.* 2015, Bushuev *et al.* 2017), suggested to be an  
56 ecophysiological adaption to the warmer and more seasonally stable climates across the  
57 tropics, in contrast to the cooler and more seasonally variable climates at temperate latitudes  
58 (White *et al.* 2007, Jetz *et al.* 2008, Khaliq *et al.* 2014). For example, tropical birds typically  
59 have narrower thermo-neutral zones (TNZ; defined by the upper and lower temperature  
60 bounds at which a species begins thermoregulation) than temperate species, reflecting  
61 reduced demands of thermogenesis in less seasonal and warmer climates (e.g. Khaliq *et al.*  
62 2015). Whether the physiology of tropical birds is actually a product of reduced climatic  
63 variability has subsequently been questioned, however, where the BMR of over 250 species

64 in the Peruvian Andes did not differ across elevation despite the cooler and more variable  
65 environmental conditions at higher elevations (Londoño *et al.* 2015, 2017).

66 Two studies investigating seasonal variation in metabolic rates have also indicated that  
67 the physiology of tropical birds may be unrelated to environmental temperatures (McKechnie  
68 *et al.* 2015, Pollock *et al.* 2019). Both Pollock *et al.* (2019) and Wells & Schaeffer (2012)  
69 found considerable variation in BMR, PMR, and thermoregulatory traits in lowland  
70 Panamanian rainforest species between the summer and winter months. The direction of the  
71 variability in these studies was not consistent between species, however, with some taxon  
72 displaying no seasonal acclimatisation in BMR or thermoregulatory traits, while others  
73 increased or decreased metabolic rates in the winter, despite the lack of seasonal temperature  
74 fluctuations (Pollock *et al.* 2019). Similarly, Wells & Schaeffer (2012) found decreased PMR  
75 in tropical birds during the winter months, the opposite of which is generally found in  
76 temperate species. Taken together, these studies suggest that the ecophysiology of tropical  
77 species is dictated by factors other than temperature (McKechnie *et al.* 2015). The ubiquity of  
78 this hypothesis remains unclear, however, because comparative studies are lacking away from  
79 tropical lowland forests where climatic variation is generally low.

80 Tropical mountains offer valuable case studies in avian physiology because they allow  
81 assessments of whether physiological traits of resident species relate to variable climates  
82 (Londoño *et al.* 2015). Changes in elevation along tropical mountains are characterised by  
83 sharp changes in temperature isotherms and it has been historically hypothesised that tropical  
84 montane species have evolved distinct physiological tolerances unique to their elevational  
85 distributions (Janzen 1967, Ghalambor *et al.* 2006). Thus, if tropical montane species are  
86 physiologically sensitive, the physiological traits of sedentary species may also reflect  
87 changes in seasonal conditions. To explore this further, we assessed whether cooler  
88 environmental temperatures at higher elevations in tropical mountains manifest in

89 physiological cold-tolerance traits in resident species, and whether species displayed uniform  
90 shifts between seasons.

91 We compared metabolic rates (both BMR and thermoregulation in response to  
92 manipulated temperatures),  $M_b$ , and total blood haemoglobin concentrations ( $H_b$ ) of five  
93 sedentary highland Central American songbirds. The BMR of a species is a widely used  
94 measure in avian physiology, reflecting the lowest energetic requirements for homeostasis,  
95 while thermoregulation reflects the metabolic responses to changing temperatures (Lighton  
96 2008). In addition,  $M_b$  and  $H_b$  reflect fluctuations in physiological condition related to both  
97 oxidative stress ( $H_b$ ) and cold tolerance (Swanson 2010, Labocha & Hayes 2011, Minias 2015  
98 , 2020), allowing us to assess whether any observed changes in these traits also related to  
99 changes in condition. We asked whether our study species responded to cooler winter  
100 conditions (non-breeding season) by increasing BMR,  $M_b$  and  $H_b$ , and whether these changes  
101 were consistent between species. Additionally, we asked whether a higher elevation species  
102 displayed physiological differences attributable to colder conditions at higher elevations such  
103 as higher  $H_b$  content, increased BMR and lower temperature limits to the TNZ.

104

## 105 **Methods and Materials**

### 106 *Study site and focal species*

107 We measured BMR,  $M_b$ ,  $H_b$  and thermoregulation in black-headed nightingale-thrushes  
108 *Catharus mexicanus*, ruddy-capped nightingale-thrushes *C. frantzii*, chestnut-capped  
109 brushfinches *Arremon brunneinucha*, grey-breasted wood wrens *Henicorhina leucophrys*, and  
110  $H_b$  and  $M_b$  only in common bush tanagers *Chlorospingus flavopectus* (hereafter, BHNT,  
111 RCNT, CCBF, GBWW and COBT, respectively) in Cusuco National Park, in the Sierra del  
112 Merendón, north-western Honduras (approximately N15.552, E - 88.296). Fieldwork was  
113 undertaken between June-August, 2017/18 and January 2018.

114 The study species breed during the warmer months of May-August (summer) at the  
115 field site (see Howell & Webb 1995), while January (winter) is cooler. We measured  
116 environmental temperature ( $T_e$ ; °C) at two research camps (1550m and 1950m, respectively-  
117 see below) using remote loggers (HOBO UA-001-64, Onset, USA, data pooled from 2-3  
118 loggers per camp) deployed for the entirety of the study period in order to capture seasonal  
119 and elevational  $T_e$  variation. Loggers were attached to trees ~1m off the forest floor to best  
120 represent the  $T_e$  experienced by the study species. Mean  $T_e$  (°C  $\pm$  SD) during the summer at  
121 1550m was  $17.4 \pm 1.7$  (max = 24.7, min = 12.2), and at 1950m was  $15.5 \pm 1.4$  (max = 22, min  
122 = 11.2). During the winter,  $T_e$  at 1550m was  $13.2 \pm 2.2$  (max = 21.2, min = 7.8), and at  
123 1950m was  $11.3 \pm 2.11$  (max = 16.3, min = 5.24) (Fig. S1).

124 We studied birds at both research camps, but because of logistical difficulties, all  
125 winter fieldwork was undertaken at the lower elevation (1550m) camp only. Each species in  
126 our study occurs at both camps except RCNT (which occurs only at higher elevations at the  
127 study site – see Jones *et al.* (2019)). Accordingly, we only obtained summer data on RCNT.  
128 None of the study species undertake any known seasonal elevational movements at the study

129 site (determined by both consistent captures/re-sightings of banded birds at their site of  
130 original capture, and/or year-round territory occupation throughout the course of the study).

### 131 *Capture and handling*

132 We captured birds using 6 or 9 m mist-nets, generally lured into the nets by conspecific  
133 playback. This method inherently targeted territorial holders and as such our sample is biased  
134 towards male birds. After capture, each bird was measured for a standard set of biometrics  
135 (e.g. maximum wing chord and tarsus length) and  $M_b$  (in g) to an accuracy of 0.1g using  
136 digital scales (SA-500, SATRUE, Taiwan). Each bird was banded with a uniquely numbered  
137 aluminium ring (Aranea, Łódź, Poland) and unique field-identifiable combination of coloured  
138 rings for future study.

139 Birds were aged and sexed, where possible, by a combination of plumage dimorphism  
140 and moult limits, and checked for evidence of breeding condition (enlarged cloacal  
141 protuberance and brood patches). During the summer, most males of the study species  
142 (particularly BHNT, RCNT, CCBF) were in reproductive condition (enlarged cloacal  
143 protuberances). Breeding seasons for the study species are prolonged, and as such, it is  
144 generally not possible to sample birds in the summer season not in some state of reproductive  
145 condition. We did not include juvenile birds in any of our samples, although we did include  
146 first-cycle birds (i.e. born the previous breeding season), because they are functionally adult  
147 (e.g. Wolfe *et al.* 2010). Fat and muscle content were also assessed, but variance was virtually  
148 indistinguishable between season (where fat reserves were rarely present and muscle profiles  
149 were constant). These data were thus not suitable for statistical tests. Female birds with  
150 edematous brood patches were released after processing for ethical reasons. Birds that were  
151 transferred to the respirometry system (see below) for metabolic measurements were caught  
152 between 15:00 and 18:30 (dusk).

153

154 *Blood sampling*

155 We measured H<sub>b</sub> concentration in grams per decilitre (g/dL) using a portable analyser  
156 (Prospect haemoglobin, prospect Diagnostics Ltd, UK). H<sub>b</sub> concentrations reflect the ability of  
157 a bird to meet its oxygen requirements and as such it is a measure of physiological condition  
158 and cold adaption for both between and within species comparisons (Dubay & Witt 2014,  
159 Minias 2015). Blood was sampled shortly after capture from the alar vein and drained directly  
160 into a reagent-free cuvette (<8uL) specific to the analyser. After blood was drained into the  
161 cuvette, pressure was applied to the vein using cotton wool to stem the bleeding (see  
162 procedures described by Owen (2011)). Each blood sample was tested three times in the unit,  
163 with the resulting values averaged. The accuracy of the H<sub>b</sub> analyser was measured every 14  
164 days throughout fieldwork using standardised control measures (DiaSpect Control, DiaSpect  
165 Mecidal, Germany) at three concentrations: 8.0±0.4 g/dL, 12.6±0.6 g/dL and 16.0±0.8 g/dL.

166 *Respirometry*

167 We measured energy metabolism (as a rate of oxygen consumption V̇O<sub>2</sub> ml/min<sup>l</sup>)  
168 using open flow respirometry with a portable gas analysis system (FoxBox, Sable Systems,  
169 USA; hereafter 'FoxBox'). Birds were placed in a custom-built 20cm<sup>3</sup> Perspex chamber fitted  
170 with a perch into which a constant airflow was supplied. We experimentally manipulated  
171 temperatures by placing the respirometry chamber inside a modified cooler box fitted with a  
172 Peltier thermoelectric cooler module (AC-046, TE Technology, USA), capable of  
173 heating/cooling the interior of the cool box by a temperature controller (TC-48-20, TE  
174 Technology, USA). We checked temperatures inside the chamber with a logger (HOBO UA-  
175 001-64, Onset, USA) and offset slight differences between the temperature set inside the  
176 cooler box and inside the chamber using the relevant setting on the temperature controller.  
177 Temperature plates were powered by an analogue 24V power bench (ALF2412, ELC, UK),  
178 externally powered by a portable generator.



179 Ambient air was dried (self-indicating silica gel, GeeJay chemicals, UK) and pulled  
180 through the chamber at  $1000\pm 1$  ml/min; a sufficient flow rate at which O<sub>2</sub> levels did not fall  
181 below 0.5% of natural levels, preventing hypoxia/hypercapnia. Air flow was measured and  
182 controlled by a linearized mass flow meter internal to the FoxBox, meaning temperature and  
183 barometric pressure compensation to STP were not required. Excurrent air from the chamber  
184 was dried again (silica gel) before entering the FoxBox where O<sub>2</sub> and CO<sub>2</sub> content were  
185 recorded at 1s intervals (Sable Systems ExpeData, Las Vegas, USA). A second air channel  
186 (outside ambient air, taken directly adjacent to incurrent air to chamber) for use as reference  
187 ambient air was manually routed to the FoxBox following each temperature treatment (see  
188 below) to correct for drift in the analysers. Before sessions began, the O<sub>2</sub> analyser was  
189 spanned to 20.95% (environmental O<sub>2</sub> concentration) after gas measurements had stabilised.

#### 190 *Experimental procedure and temperature manipulations*

191 All respirometry sessions were undertaken at night to ensure birds were in their natural  
192 resting circadian phase. Following capture, we roosted all birds in cloth bags in a quiet room  
193 where they were fasted (without food). Birds were transferred to the respirometry system after  
194 dusk (1845 onwards) and left to acclimatise to the chamber for at least 45mins before  
195 temperature manipulations began. This acclimatisation period was sufficient washout time for  
196 residual chamber air to be replaced (see Lighton 2008).

197 Each bird was subjected to 1-4 temperature treatments per night. Temperature  
198 treatments for each bird were randomly chosen within five bands: 5-10°C, 11-16°C, 17-22°C,  
199 23-28°C, and 29-34°C, the treatment temperatures within which were systematically rotated  
200 (e.g. within 5-10°C, 5°C, then 6°C etc. to avoid repeated measures at the same temperatures).  
201 We did not exceed 34°C during temperature manipulations as the focus was cold tolerance in  
202 the study species (the lower temperature limit of thermal-neutrality), and 34°C was likely to  
203 be within thermal-neutrality for our study species (Londoño *et al.* 2017). Once each

204 temperature treatment was stable ( $\pm 0.5^\circ\text{C}$  of target temperature), the bird was left for a further  
205 45 minutes at each temperature before data were accepted for metabolic measurements. We  
206 then recorded data for ~20 minutes before setting the next temperature treatment. Baselines of  
207 7 minutes of ambient air were taken before each new temperature treatment was set (exact  
208 time intervals varied but were typically every 1-1.5hrs). All metabolic data throughout the  
209 study were taken at least four hours after capture to ensure birds were post-absorptive  
210 (Karasov 1990). Respirometry sessions typically finished by 03:00, and birds were released at  
211 the site of capture the following morning.

## 212 *Data processing*

213 Respirometry traces were baseline corrected and converted to  $\dot{V}\text{O}_2$  ( $\text{ml}/\text{min}^{-1}$ ) using  
214 equation 11.7 in Lighton (2008) (equation (1) below):

$$215 \quad (1) \dot{V}\text{O}_2 = FR ((Fi\text{O}_2 - Fe\text{O}_2) - Fi\text{O}_2 (Fe\text{CO}_2 - Fi\text{CO}_2)) / (1 - Fi\text{O}_2)$$

216 Where, FR= Flow Rate and  $Fi\text{O}_2/\text{CO}_2/Fe\text{O}_2/\text{CO}_2$ = incurrent and excurrent fractional  
217 concentrations of  $\text{O}_2$  and  $\text{CO}_2$ , respectively. Incurrent Oxygen ( $Fi\text{O}_2$ ) is at atmospheric levels  
218 (0.2095%).  $\dot{V}\text{O}_2$  at each temperature trial was taken as the lowest continuous average over  
219 three minutes when the trace was low and stable (all values  $\leq 0.05\%$  of the mean), and where  
220 temperature had been constant for 45-minutes (see above). We subsequently converted  $\dot{V}\text{O}_2$   
221 to Watts (W) using a joule conversion of  $20.1 \text{ J mL}^{-1}$  (Gessaman & Nagy 1988).

## 222 *Statistical analysis*

223 All analyses were conducted in 'R' (R Core Team 2016). Values are presented as  
224 mean  $\pm$  standard deviation (SD) or standard error (SEM) for model parameters, and  
225 statistical significance thresholds as  $p$  values  $< 0.05$ . We used a mixed modelling approach  
226 for all analyses due to the repeated measures either inherent to the experimental design (e.g.

227 metabolic measurements of individuals at multiple treatment temperatures), or because of the  
228 repeated measures on individuals between seasons.

229 We analysed metabolic rates in a two-step process. Firstly we fitted linear mixed  
230 effects models for each species using the lme4 package (Bates *et al.* 2014). We modelled  
231 metabolic rate ( $W$ ) as a function of season (summer/winter),  $M_b$  (g), experimental temperature  
232 treatment ( $^{\circ}\text{C}$ ) and elevation (m) (of the captured bird) and a season  $\times$  experimental  
233 temperature interaction as fixed effects, and included bird identity (individual) as a random  
234 effect. The factor ‘season’ was not included for RCNT models because no winter data were  
235 collected for this species. In incidences when  $M_b$  was identified as a significant effect in full  
236 models (BHNT and CCBF), we repeated the analyses using mass-specific metabolic rate as  
237 the response variable. All continuous explanatory variables were scaled to account for  
238 potential sensitivity in magnitudes of change within variables. We then selected best fitting  
239 models for each species by dredging all possible model iterations, ranking the resulting  
240 models by corrected Akaike Information Criterion (AICc) in the MuMIn package (Barton  
241 2016). We then examined models for significant parameters with Wald-Chi square tests using  
242 the *car* package (Fox *et al.* 2011). All models within  $6\Delta$  AICc of the best-fitting model, as  
243 well as the saturated and null models per species are presented in the supplementary  
244 materials. Hereafter, ‘best-fitting model’ refers to that with  $0\Delta$  AICc, while ‘top model set’  
245 refers to all models within  $6\Delta$  AICc. When the best-fitting model had multiple parameters,  
246 parsimonious models for each significant effect in this model are also presented. This  
247 modelling approach broadly follows recommendations suggested by Harrison *et al.* (2018).

248 Where treatment temperature was identified as a significant parameter in the top model  
249 set, we then fitted non-linear mixed models to the data in the nlme package (Pinheiro *et al.*  
250 2017). These models estimated how metabolic rates were affected by temperature by  
251 estimating the inflection temperature (lower critical limit of thermoneutrality -  $T_{lc}$ ) at which  
252 species began thermoregulation (i.e. an increase in metabolic rate), the slope of this

253 relationship (minimum thermal conductance -  $C_{\min}$ ) and metabolic rate above  $T_{lc}$  (BMR). This  
254 method can underestimate minimum thermal conductance (see McNab 1980), but because we  
255 did not measure body temperatures, this allowed an approximation of energetic costs of  
256 thermoregulation below  $T_{lc}$ . Because of this, we elected not to statistically compare metabolic  
257 responses to temperature, instead qualitatively comparing values of  $C_{\min}$  and  $T_{lc}$  between  
258 species. In one species (BHNT), where seasonal differences in metabolic rates were apparent  
259 from model selections, we added a two-way factor of ‘season’ (summer/winter) in order to  
260 assess specifically which parameters (BMR,  $C_{\min}$  or  $T_{lc}$ ) differed between season.

261 We analysed  $H_b$  using the same modelling process as described for the first step of  
262 metabolic data. We predicted  $H_b$  (g/dL) as a function of sex (male/female), season  
263 (summer/winter), elevation (m) and a sex  $\times$  season interaction as fixed effects, with bird  
264 identity (individual) as a random effect. The factors ‘sex’ and ‘season’ for RCNT, and ‘sex’  
265 for GBWW were not included for these models, as these data were not available. After  
266 assessing intraspecific differences in  $H_b$  per species, we assessed interspecific differences  
267 with post-hoc comparison tests using the multcomp package (Bretz *et al.* 2010) on a simpler  
268 mixed model of  $H_b$  as a function of species. We compared summer and winter datasets  
269 separately, however, to compare like-for-like data. Finally, we tested for seasonal differences  
270 in  $M_b$  using Wald-Chi square tests on linear mixed models of  $M_b$  as a function of season. For  
271 BHNT – the only species we were able to discern sex between season – we also tested for sex  
272 specific season changes in  $M_b$ .

273 To place our results within the broader context of the physiological diversity of  
274 tropical birds, we compared BMR of the species in our study to predicted values from mass-  
275 scaling exponents, using phylogenetically informed power equations in Londoño *et al.*  
276 (2015). Values are presented as percentages of predicted BMR, using coefficients presented  
277 for tropical species when those with ambiguous breeding distributions were excluded from  
278 the dataset (see Londoño *et al.* 2015). For species in our study that displayed no seasonal

279 changes in BMR, we pooled data across seasons. We considered values within 10% of those  
280 predicted as within the expected range broadly following similar studies (e.g. Smit &  
281 McKechnie 2010). We estimated BMR for each species in our study by taking the lowest  
282 measure of metabolic rate per individual above  $T_{lc}$ , comparable to similar studies (Londoño *et*  
283 *al.* 2015). Finally, for purposes of comparison, we present summer and winter values for  
284 BMR (both whole animal and mass-specific),  $H_b$  concentrations, and  $M_b$  and calculate  
285 winter/summer ratios by dividing mean winter values by mean summer values (McKechnie  
286 2007, Pollock *et al.* 2019).

## 287 **Results**

### 288 *Metabolism; responses to temperature and seasonal change*

289 We found a strong negative effect of temperature on metabolic rates for three species in  
290 the best fitting models (BHNT  $\chi^2_1 = 58.708$ ,  $P < 0.001$ ; CCBF  $\chi^2_1 = 29.19$ ,  $P < 0.001$ ; GBWW  
291  $\chi^2_1 = 19.72$ ,  $P < 0.001$ ) but not RCNT (Fig. 1). Metabolic rate (W) was best predicted by  
292 temperature alone for CCBF and GBWW, for BHNT, however, season was also a significant  
293 covariate ( $\chi^2_1 = 21.872$ ,  $P < 0.001$ ) in addition to temperature. For RCNT, none of the  
294 variables tested influenced metabolic rates and the best-fitting model was one with the  
295 intercept alone. We found elevation had no effect on metabolic rate for any of the study  
296 species, although for RCNT elevation was significant in the second ranked model ( $\chi^2_1 =$   
297  $4.056$ ,  $P = 0.044$ ).  $M_b$  was a significant variable in full and top model sets for both BHNT and  
298 CCBF, but when the same analyses were undertaken on mass-corrected values for these  
299 species, our results were comparable. Because of this, we fitted subsequent models on for  
300 these two species on whole-animal values. For full model selection results for each species  
301 (including mass corrected fits), see Tables S1-4.

302 Lower critical temperatures ( $T_{lc}$  °C  $\pm$  SEM) were comparable between species  
303 (excluding RCNT); BHNT (winter =  $19.4 \pm 2.7$  °C, summer =  $23.3 \pm 3.14$  °C), CCBF ( $19.2 \pm$   
304  $2.46$  °C), and GBWW ( $22.3 \pm 3.06$  °C) (see Fig. 1). Similarly, estimates of thermal  
305 conductance (W °C  $\pm$  SEM) were also comparable between species; BHNT (winter =  $0.0127 \pm$   
306  $0.004$  °C W, summer =  $0.0156 \pm 0.005$  °C W), CCBF ( $0.0120 \pm 0.004$  °C W) and GBWW  
307 ( $0.0097 \pm 0.002$  °C W). No significant differences in either  $T_{lc}$  or  $C_{min}$  were detected between  
308 seasons for BHNT ( $T_{lc}$ :  $T = 1.2141$ ,  $df = 57$ ,  $P = 0.229$ ;  $C_{min}$ :  $T = 0.6555$ ,  $df = 57$ ,  $P = 0.514$ ),  
309 but BMR was significantly different between seasons ( $T = 2.3876$ ,  $df = 57$ ,  $P = 0.02$ ). For full  
310 non-linear mixed model fits see Table S5.

311 In BHNT, summer BMR ( $0.43 \pm 0.05$  W) was 19.4% higher than winter BMR ( $0.36 \pm$   
312  $0.07$  W). No seasonal differences in BMR were detected in CCBF (summer =  $0.53 \pm 0.04$  W /  
313 winter =  $0.52 \pm 0.05$  W) or GBWW (summer =  $0.27 \pm 0.04$  W / winter =  $0.31$ W), (Table 1,  
314 Fig. 1), although the winter sample for the latter species is from a single bird.

315 BMR in our species was generally greater than predicted (mean % difference  $\pm$  SD)  
316 when compared to mass-scaling exponents for tropical birds. Winter BMR for BHNT ( $111.5$   
317  $\pm 3$ ) was within the expected range, whereas summer BMR for BHNT ( $129.8 \pm 3.5$ ), summer  
318 RCNT ( $150.4 \pm 2.9$ ), and pooled values across season for CCBF ( $132.1 \pm 3.7$ ) and GBWW  
319 ( $125 \pm 1$ ) were greater than expected (Fig. 2).

#### 320 *Body mass*

321 We detected seasonal changes in  $M_b$  in two of the four species for which we had data  
322 (Fig. 2, Table 1). No seasonal changes in  $M_b$  were evident in BHNT and CCBF (BHNT,  $\chi^2_1$   
323  $= 3.06$ ,  $P = 0.08$ ; CCBF,  $\chi^2_1 = 0.49$ ,  $P = 0.48$ ), whereas GBWW and COBT had higher  $M_b$  in  
324 the breeding season (GBWW,  $\chi^2_1 = 222.8$ ,  $P < 0.01$ ; COBT,  $\chi^2_1 = 21.09$ ,  $P < 0.001$ ). In  
325 addition, for BHNT we found no seasonal changes in  $M_b$  dependent on sex ( $\chi^2_1 = 2.27$ ,  $P =$   
326  $0.13$ ).

#### 327 *Haemoglobin concentrations*

328 In all study species,  $H_b$  concentrations varied little with changes in elevation, between  
329 season, and between sexes, with intercept only models performing best for each species. For  
330 BHNT, however, there was evidence for an effect of season dependent on sex, such that  $H_b$  is  
331 slightly higher in summer, over winter males (the breeding season  $\times$  sex interaction term was  
332 significant in the second ranked model for this species:  $\chi^2_1 = 4.923$ ,  $P = 0.03$ ; Table S6). For  
333 GBWW, elevation was also significant in the second ranked model ( $\chi^2_1 = 5.074$ ,  $P = 0.02$ ;  
334 Table S9), suggesting that  $H_b$  decreases with increases in elevation (although the limited

335 sample may explain this effect). Overall, however, H<sub>b</sub> concentrations for each of the study  
336 species did not appear to be influenced by any of the hypothesised variables (for all species  
337 model fits see Tables S6-S10).

338 Blood H<sub>b</sub> concentrations were comparable between all species, excepting RCNT (Fig.  
339 3, Table 1). We found no intraspecific differences in winter H<sub>b</sub> concentrations (all species  
340 comparisons  $P \geq 0.55$ ). Similarly, we also found no intraspecific differences in summer H<sub>b</sub>  
341 concentrations ( $P \geq 0.10$ ) except for RCNT, which was distinctly higher than the other four  
342 species ( $P < 0.001$  for all RCNT – other species comparisons). For all post-hoc comparison  
343 tests see Table S11.



## 344 **Discussion**

345       The aims of our study were twofold. Firstly, we wanted to determine whether our study  
346 species displayed uniform shifts in physiological traits across season, and secondly, to  
347 ascertain whether there was evidence for cold adaption in a higher elevation tropical species.  
348 Contrary to our first hypothesis, for the three species (BHNT, CCBF and GBWW) for which  
349 we had data between seasons, only BHNT regulated metabolic rates between season. This  
350 species up-regulated BMR in the warmer summer, whereas CCBF and GBWW showed no  
351 evidence for seasonal changes (although we recognise the sample size for winter GBWW is  
352 small and possibly inconclusive). We also found no evidence for seasonal shifts in  $H_b$   
353 concentrations and variable seasonal changes in  $M_b$ . In support of our second hypothesis,  
354 however, RCNT was a clear outlier in all measures, with evidence of cold tolerance traits (no  
355 discernible metabolic response to temperature), higher summer BMR relative to  $M_b$ , and  
356 higher  $H_b$  concentration than other species.

### 357 *Physiological shifts with season*

358       The variability in metabolic rate between seasons observed across species in our study  
359 is consistent with comparable studies on lowland tropical birds. For example, the interspecific  
360 variation in BMR in our study (W/S ratio range 0.83-1.14; Table 1) is within the range of that  
361 measured in lowland tropical species in Panama (W/S ratio range 0.71-1.33; Pollock *et al.*  
362 (2019)). Because our study was at higher elevation, and thus a cooler  $T_e$ , we hypothesised that  
363 seasonal changes in metabolic rates may reflect these cooler  $T_e$  and minor changes in season.  
364 Instead, our results appear unrelated to  $T_e$  because no shifts in metabolic rates were consistent  
365 with heat conservancy (i.e. increases in BMR and thermoregulatory traits in winter) as is  
366 common among temperate species (Swanson & Garland 2009, Swanson 2010, Smit &  
367 McKechnie 2010, McKechnie *et al.* 2015). This apparent lack of relationship with  $T_e$  was also  
368 reflected in  $M_b$  between season, which were consistent, or increased in summer (GBWW and  
369 COBT), also opposite of seasonal changes in  $M_b$  typical among temperate species. In a

370 similar study, Pollock *et al.* (2019) did not detect any significant differences in  $M_b$  changes  
371 between temperate and tropical birds, although these authors also found substantial variation  
372 among tropical species, similar to our results.

373 Our study is only the third we are aware of to compare metabolic rates between seasons  
374 in tropical species. Like other studies, however, we also show that variation in metabolic rate  
375 in tropical birds is apparently unrelated to  $T_e$  and the direction of change is highly variable  
376 across species (Wells & Schaeffer 2012, Pollock *et al.* 2019). Although there are few studies  
377 from the tropics to which we can make direct comparisons, this variation is also consistent  
378 with seasonal changes in metabolic rates in subtropical birds. Substantial variation in BMR  
379 has also been documented in subtropical species, ranging from considerable winter  
380 reductions, to considerable winter increases (W/S ratio range 0.66-1.63; McKechnie *et al.*  
381 2015), a magnitude of shifts comparable to temperate species but with less predictable  
382 seasonal directionality (Noakes *et al.* 2017).

383 Because seasonal changes in metabolic rates appears unrelated to  $T_e$  in our, and other,  
384 studies in the tropics, what drives these seasonal regulations (or lack thereof) remains unclear.  
385 One emerging explanation for this pattern is that ‘metabolic niches’ are greater at tropical  
386 latitudes (Anderson & Jetz 2005), where intrinsic relationships between species  
387 characteristics and metabolic rate reflect the seasonal variation in metabolic rates (McKechnie  
388 *et al.* 2015). For example, specific behavioural changes with season unique to a given species  
389 may manifest in changing maintenance costs of metabolically active tissues (Swanson 2010).  
390 In BHNT, BMR was up-regulated in summer (19.4% greater than winter), the opposite of  
391 patterns typically displayed in temperate species (e.g. Smit & McKechnie 2010). Thus,  
392 behavioural differences related to reproductive activity between season in our study species  
393 may covary with BMR because of the energetic costs associated with them (e.g. increased  
394 activity rates in males). That physiological control mechanisms may shape the diversity of life  
395 history traits in tropical birds has previously been suggested (Ricklefs & Wikelski 2002,

396 Williams *et al.* 2010). However, we are aware of only one study that has assessed the  
397 relationship between metabolic rate and behavioural energy usage in a tropical bird (Steiger *et*  
398 *al.* 2009), and none that have assessed seasonal differences in metabolic intensity with life-  
399 history traits in tropical species.

400 A shortfall in our interpretation of the processes underpinning these seasonal changes,  
401 however, is that we did not concurrently measure body temperatures. Facultative  
402 hyperthermia, where short-term reductions in body temperature reduce the energetic demands  
403 of metabolic heat production are thought to be common across birds (McKechnie &  
404 Lovegrove 2002) and have been found in various tropical species, often concurrently with  
405 reductions in metabolic rate (Bartholomew *et al.* 1983, Merola-Zwartjes 1998, Merola-  
406 Zwartjes & Ligon 2000, Steiger *et al.* 2009, Burnett *et al.* 2019). As such, we cannot eliminate  
407 seasonal changes in body temperature as an alternative explanation for the interspecific  
408 differences we observe. Irrespective of the mechanism, however, our results still display  
409 species-specific changes in metabolic rate between seasons.

410 That we found no clear changes in H<sub>b</sub> concentrations in our study species with season is  
411 intriguing, particularly when coupled with the variation observed in BMR. Firstly,  
412 thermogenic demands may result in elevated H<sub>b</sub> concentrations (Swanson 1990, Powell *et al.*  
413 2013), so our result that H<sub>b</sub> concentrations appeared unchanged between seasons is consistent  
414 with the lack of other apparent physiological changes related to increased cold tolerance.  
415 Secondly, because H<sub>b</sub> concentrations reflect oxidative stress (Minias 2015), the lack of  
416 seasonal change in H<sub>b</sub> concentrations in the species in our study are probably indicative of  
417 limited physiological stress between seasons. This may be particularly the case in BHNT,  
418 where seasonal changes in BMR did not appear to covary with H<sub>b</sub> concentrations, suggesting  
419 that increased physiological stress during reproduction is not a sufficient explanation for  
420 seasonal changes in BMR observed in this species, at least in males. We remain cautious in  
421 this conclusion, however, because there was some signal of a difference in male H<sub>b</sub>

422 concentrations between season, although there was much overlap and quantities were similar  
423 ( $H_b$  g/dL content in winter ( $n = 15$ )/summer ( $n = 54$ ) male BHNT;  $13.5 \pm 0.98 / 13.9 \pm 1.05$ ).

424 We are aware of no other studies on  $H_b$  concentrations in tropical forest birds from  
425 which to directly compare, but the general lack of seasonal changes across our study species  
426 may be reflective of ‘slow paced’ life-histories of tropical birds, where longevity is facilitated  
427 by greater investment in self-maintenance (Ricklefs & Wikelski 2002, Wiersma *et al.* 2007).  
428 Although, only on temperate species, evidence in support of a coevolution with slower paced  
429 life-history and decreased levels of oxidative stress has been displayed (Vágási *et al.* 2018).  
430 Reproductive periods in female birds may be particularly energetically demanding (Williams  
431 *et al.* 2004) but because of the difficulties in determining sex in many of the species in our  
432 study in the winter, we were not able to fully interrogate this hypothesis. Future studies could  
433 clarify this by comparing magnitudes of change between tropical and temperate species with  
434 the addition of new field data (which for  $H_b$  concentrations are simple and cost-effective to  
435 obtain).

#### 436 *Implications for elevational adaption*

437 Among our study species, RCNT was distinct. We found no low temperature limit at  
438 which this species began thermoregulation, a higher BMR than predicted by mass-scaling  
439 exponents among the species in our study (over greater 50% greater than that predicted for  
440 tropical birds), and higher  $H_b$  concentration than other study species: all traits consistent with  
441 cold tolerance (Swanson 2010, Pollock *et al.* 2019). Few studies on the physiology of tropical  
442 montane birds exist for which we can directly compare, although similar (albeit isolated)  
443 examples of cold tolerant birds in the Peruvian Andes (Londoño *et al.* 2017) and high  
444 elevation tropical bats and mice have been found (Soriano *et al.* 2002, Pasch *et al.* 2013).

445 The physiological differences apparent in RCNT are particularly intriguing when  
446 considered against the backdrop of elevational range restrictions characteristic of tropical

447 montane species (e.g. McCain 2009). Realistically, it is unlikely that the traits we observe are  
448 a product of differences in present day  $T_e$  across elevation in our site;  $T_e$  did not strikingly  
449 differ across elevation, and that BHNT, a parapatric congener (see Jones *et al.* 2019) displays  
450 divergent physiological traits. The two species of nightingale-thrush are not sister species  
451 (Voelker *et al.* 2013) and one possibility is that the divergence in RCNT is a product of  
452 conserved traits from historic isolation (Wiens *et al.* 2010). That the species are parapatric  
453 and compete at their elevational range limits (Jones *et al.* 2019) has likely developed as a  
454 result of range convergence (Freeman 2015). This trait divergence (and competitive  
455 interactions) resembles that of morphological phenotypes between two parapatric wood wrens  
456 (*Henicorhina* sp.) in Colombia, the elevational ranges of which have converged through  
457 secondary contact (Caro *et al.* 2013). Further supporting this hypothesis, elevational range has  
458 been suggested as an important driver of the evolution in variation of blood oxygen carrying  
459 capacity in birds (Minias 2020).

460         A general lack of evidence for intraspecific variation in  $H_b$  concentrations or metabolic  
461 rate with increases in elevation is consistent with a lack of apparent elevational specialism in  
462 our study species (excepting RCNT). However, because we only tested for an intraspecific  
463 effect across a small elevational range we remain cautious in this conclusion as this may not  
464 be conclusive evidence that one does not exist. Intraspecific differences ascribed to  
465 elevational adaption have been displayed in Tyrannid flycatchers (*Anairetes* sp.) across a  
466 larger elevational gradient (~1200m) in the Peruvian Andes (Dubay & Witt 2014) and for  
467 resident species in the subtropical Himalayas (Barve *et al.* 2016). Nonetheless, a lack of  
468 intraspecific signal in physiological traits across elevation is still consistent with an apparent  
469 lack of elevational specialism, although more comprehensive tests across a broader  
470 elevational range at our study site would clarify this, particularly with the inclusion of lower  
471 elevation species.

472 The species in our study had generally higher BMR than predicted by  $M_b$  for tropical  
473 birds, with only winter BMR of BHNT falling within the expected values. To some extent  
474 this contrasts with Londoño *et al.* (2015) who, across a large range of species, displayed that  
475 higher elevation tropical species had comparable BMR to lowland tropical residents. The  
476 specific reasons our BMR measures were slightly higher than predicted is not clear and did  
477 not appear to be a result of intraspecific variation across elevation (e.g. Lindsay *et al.* 2012).  
478 One possibility is that species that do not undergo seasonal shifts in BMR maintain overall  
479 higher BMR throughout the year, although because little is known of the specific drivers of  
480 seasonal shifts in BMR in tropical species, rigorous testing is required to determine this.  
481 Nonetheless, despite generally higher BMR than predicted by allometric scaling, our values  
482 are still within the range previously measured for tropical birds (Fig. S2).

483 In conclusion, our results support two emergent patterns in our understanding of the  
484 physiological diversity of tropical birds. Firstly, that seasonal changes in metabolic rates  
485 appear to be flexible and possibly species specific, more broadly reflecting the growing  
486 appreciation for flexible phenotypic diversity in metabolic rates in birds (Piersma & Drent  
487 2003, McKechnie *et al.* 2006, McKechnie 2007). Secondly, that the physiology of tropical  
488 birds appears unrelated to  $T_e$  as conventional hypotheses have suggested (see Chown *et al.*  
489 2004, Londoño *et al.* 2015). However, we did find evidence of distinct interspecific  
490 differences in our study, the generalities of which require more comprehensive examination.  
491 Despite growing interest, substantial knowledge gaps remain in our understanding of the  
492 ecophysiology of tropical birds. This is particularly so for tropical montane species, that may  
493 be characterised by distinct interplays between physiological and life-history characteristics  
494 (Goymann *et al.* 2004, Scholer *et al.* 2019).

495 **Acknowledgements**

496 This study would not have been possible without the logistical support of numerous staff and  
497 volunteers of Operation Wallacea in Cusuco National Park, Honduras. All work was  
498 undertaken under permits issued by Instituto de Conservacion Forestal in Honduras, and with  
499 ethical approval by Royal Holloway University of London ethics committee. We also thank  
500 Craig White for technical support. This work was supported by the Natural Environment  
501 Research Council [grant number NE/L002485/1].

502 **References**

- 503 Anderson KJ, Jetz W (2005) The broad-scale ecology of energy expenditure of endotherms.  
504 *Ecol Lett* 8:310–318. <https://doi.org/10.1111/j.1461-0248.2005.00723.x>
- 505 Bartholomew GA, Vleck CM, Bucher TL (1983) Energy metabolism and nocturnal  
506 hypothermia in two tropical passerine frugivores, *Manacus vitellinus* and *Pipra mentalis*.  
507 *Physiol Zool* 56:370–379. <https://doi.org/10.1086/physzool.56.3.30152601>
- 508 Barve S, Dhondt AA, Mathur VB, Cheviron, ZA (2016) Life-history characteristics influence  
509 physiological strategies to cope with hypoxia in Himalayan birds. *Proc Roy Soc B-Biol Sci*  
510 283:20162201. <https://doi.org/10.1098/rspb.2016.2201>
- 511 Bates D, Mächler M, Bolker B, Walker S (2014) Fitting linear mixed-effects models using  
512 lme4. *J Stat Softw* 67:1–51. <https://doi.org/10.18637/jss.v067.i01>
- 513 Bozinovic F, Calosi P, Spicer JJ (2011) Physiological Correlates of Geographic Range in  
514 Animals. *Annu Rev Ecol Evol Syst* 42:155–179. [https://doi.org/10.1146/annurev-ecolsys-](https://doi.org/10.1146/annurev-ecolsys-102710-145055)  
515 [102710-145055](https://doi.org/10.1146/annurev-ecolsys-102710-145055)
- 516 Bushuev A, Tolstenkov O, Zubkova E, Solovyeva E, Kerimov A (2017) Basal metabolic rate  
517 in free-living tropical birds: the influence of phylogenetic, behavioral, and ecological factors.  
518 *Curr Zool* 64:33–43. <https://doi.org/10.1093/cz/zox018>
- 519 Burnett K, Zippel MN, Phillips LT, Panwar P, Mcguire LP, Boyle WA (2019) Nocturnal  
520 reductions in body temperatures in high elevation Neotropical birds. *Trop Ecol* 60:581-586.  
521 <https://doi.org/10.1007/s42965-019-00051-y>
- 522 Caro LM, Rosales PCC, Bowie RCK, Slabbekoorn H, Cadena CD. (2013) Ecological  
523 speciation along an elevational gradient in a tropical passerine bird? *J Evol Biol* 26:357–374.  
524 <https://doi.org/10.1111/jeb.12055>



525

526 Chown SL, Gaston KJ, Robinson D (2004) Macrophysiology: large-scale patterns in  
527 physiological traits and their ecological implications. *Funct Ecol* 18:159–167.  
528 <https://doi.org/10.1111/j.0269-8463.2004.00825.x>

529 Dubay SG, Witt CC (2014) Differential high-altitude adaptation and restricted gene flow  
530 across a mid-elevation hybrid zone in Andean tit-tyrant flycatchers. *Molec Ecol* 23:3551–  
531 3565. <https://doi.org/10.1111/mec.12836>

532

533 Freeman BG (2015) Competitive interactions upon secondary contact drive elevational  
534 divergence in tropical birds. *Am Nat* 186:470–479. <https://doi.org/10.1086/682703>

535 Gessaman JA, Nagy KA (1988) Energy metabolism: errors in gas-exchange conversion  
536 factors. *Physiol Zool* 61:507–513. <https://doi.org/10.1086/physzool.61.6.30156159>

537 Ghalambor CK, Huey RB, Martin PR, Tewksbury JJ, Wang G (2006) Are mountain passes  
538 higher in the tropics? Janzen's hypothesis revisited. *Integr Comp Biol* 46:5–17.  
539 <https://doi.org/10.1093/icb/icj003>

540 Goymann W, Moore IT, Scheuerlein A, Hirschenhauser K, Grafen A, Wingfield JC (2004)  
541 Testosterone in tropical birds: effects of environmental and social factors. *Am Nat* 164:327–  
542 334. <https://doi.org/10.1086/422856>

543 Harrison XA, Donaldson L, Correa-cano ME, Evans J, Fisher DN, Goodwin CED, Robinson  
544 BS, Hodgson DJ, Inger R (2018) A brief introduction to mixed effects modelling and multi-  
545 model inference in ecology. *PeerJ* 6:e4794 <https://doi.org/10.7717/peerj.4794>

546 Jetz W, Freckleton RP, McKechnie AE (2008) Environment, migratory tendency, phylogeny  
547 and basal metabolic rate in birds. *PLoS ONE* 3:e3261–9.  
548 <https://doi.org/10.1371/journal.pone.0003261>

- 549 Jones SEI, Tobias JA, Freeman R, Portugal SJ (2019) Weak asymmetric interspecific  
550 aggression and divergent habitat preferences at an elevational contact zone between tropical  
551 songbirds. *Ibis* <https://doi.org/10.1111/ibi.12793>
- 552 Khaliq I, Fritz SA, Prinzinger R, Hof C (2015) Global variation in thermal physiology of  
553 birds and mammals: evidence for phylogenetic niche conservatism only in the tropics. *J*  
554 *Biogeogr* 42:2187–2196. <https://doi.org/10.1111/jbi.12573>
- 555 Khaliq I, Hof C, Prinzinger R, Böhning-Gaese K, Pfenninger M (2014) Global variation in  
556 thermal tolerances and vulnerability of endotherms to climate change. *Proc Roy Soc B- Biol*  
557 *Sci* 281:20141097. <https://doi.org/10.1098/rspb.2014.1097>
- 558 Labocha MK, Hayes JP (2011) Morphometric indices of body condition in birds: a review. *J*  
559 *Ornith* 153:1–22. <https://doi.org/10.1007/s10336-011-0706-1>
- 560 Lighton JR (2008) *Measuring metabolic rates: a manual for scientists*. New York.
- 561 Lindsay CV, Downs CT, Brown M (2012) Physiological variation of amethyst sunbirds over  
562 an altitudinal gradient in winter. *J Exp Biol* 212:483–493. <https://doi.org/10.1242/jeb.025262>.
- 563 Londoño GA, Chappell MA, Castañeda MDR, Jankowski JE, Robinson SK (2015) Basal  
564 metabolism in tropical birds: latitude, altitude, and the ‘pace of life’. *Funct Ecol* 29:338–346.  
565 <http://doi.org/10.1111/1365-2435.12348>
- 566 Londoño GA, Chappell, MA, Jankowski, JE, Robinson SK. (2017) Do thermoregulatory costs  
567 limit altitude distributions of Andean forest birds? *Funct Ecol* 31:204–215.  
568 <https://doi.org/10.1111/1365-2435.12697>
- 569 McCain CM (2009) Vertebrate range sizes indicate that mountains may be ‘higher’ in the  
570 tropics. *Ecol Lett* 12:550–560. <https://doi.org/10.1111/j.1461-0248.2009.01308.x>
- 571 McKechnie AE (2007) Phenotypic flexibility in basal metabolic rate and the changing view

- 572 of avian physiological diversity: a review. *J Comp Physiol B* 178: 235–247.  
573 <https://doi.org/10.1007/s00360-007-0218-8>
- 574 McKechnie AE, Lovegrove BG (2002) Avian facultative hypothermic responses: a review.  
575 *Condor* 104:705–724. <https://doi.org/10.1093/condor/104.4.705>
- 576 McKechnie AE, Swanson DL (2010) Sources and significance of variation in basal, summit  
577 and maximal metabolic rates in birds. *Curr Zool* 56:741–758.  
578 <https://doi.org/10.1093/czoolo/56.6.741>
- 579 McKechnie AE, Freckleton RP, Jetz W (2006) Phenotypic plasticity in the scaling of avian  
580 basal metabolic rate. *Proc Roy Soc B- Biol Sci* 273:931–937.  
581 <https://doi.org/10.1098/rspb.2005.3415>
- 582 McKechnie AE, Noakes MJ, Smit B (2015) Global patterns of seasonal acclimatization in  
583 avian resting metabolic rates. *J Ornith* 156:367–376. [https://doi.org/10.1007/s10336-015-](https://doi.org/10.1007/s10336-015-1186-5)  
584 [1186-5](https://doi.org/10.1007/s10336-015-1186-5)
- 585 Merola-Zwartjes M (1998) Metabolic rate, temperature regulation, and the energetic  
586 implications of roost nests in the Bananaquit (*Coereba flaveola*). *Auk* 115:780–786.  
587 <https://doi.org/10.2307/4089429>
- 588 Merola-Zwartjes M, Ligon JD (2000) Ecological energetic of the Puerto Rican Tody:  
589 heterothermy, torpor, and intra-island variation. *Ecology* 81:990–1003.  
590 [https://doi.org/10.1890/0012-9658\(2000\)081\[0990:EEOTPR\]2.0.CO;2](https://doi.org/10.1890/0012-9658(2000)081[0990:EEOTPR]2.0.CO;2)
- 591 Minias P (2015) The use of haemoglobin concentrations to assess physiological condition in  
592 birds: a review. *Conserv Physiol* 3:cov007. <https://doi.org/10.1093/conphys/cov007>
- 593 Minias P (2020) Ecology and evolution of blood oxygen-carrying capacity in birds. *Am Nat*  
594 195:788–801. <https://doi.org/10.1086/707720>

- 595 Noakes MJ, Wolf BO, McKechnie AE (2017) Seasonal metabolic acclimatization varies in  
596 direction and magnitude among populations of an Afrotropical passerine bird. *Physiol Bioch*  
597 *Zool* 90:178–189. <https://doi.org/10.1086/689030>
- 598 Owen JC (2011) Collecting, processing, and storing avian blood: A review. *J Field Ornithol*  
599 82:339–354. <https://doi.org/10.1111/j.1557-9263.2011.00338.x>
- 600 Pasch B, Bolker BM, Phelps SM (2013) Interspecific dominance via vocal interactions  
601 mediates altitudinal zonation in neotropical singing mice. *Am Nat* 182:E161–E173.  
602 <https://doi.org/10.1086/673263>
- 603 Piersma T, Drent J (2003) Phenotypic flexibility and the evolution of organismal design.  
604 *Trends Ecol Evol* 18:228–233. [https://doi.org/10.1016/S0169-5347\(03\)00036-3](https://doi.org/10.1016/S0169-5347(03)00036-3)
- 605 Pollock HS, Brawn JD, Agin TJ, Cheviron ZA (2019) Differences between temperate and  
606 tropical birds in seasonal acclimatization of thermoregulatory traits. *J Avian Biol* 50:1541–  
607 1535. <https://doi.org/10.1111/jav.02067>
- 608 Powell C, Lill A, Johnstone CP (2013) Body condition and chronic stress in urban and rural  
609 noisy miners. *Open Ornith* 6:25–31. <https://doi.org/10.2174/1874453201306010025>
- 610 R Core Team (2016) R: A language and environment for statistical computing. Vienna,  
611 Austria. <https://www.R-project.org/>.
- 612 Ricklefs RE, Wikelski M (2002) The physiology/life-history nexus. *Trends Ecol Evol*  
613 17:462–468. [https://doi.org/10.1016/S0169-5347\(02\)02578-8](https://doi.org/10.1016/S0169-5347(02)02578-8)
- 614 Scholer MN, Arcese P, Puterman ML, Londoño GA, Jankowski JE (2019) Survival is  
615 negatively related to basal metabolic rate in tropical Andean birds. *Funct Ecol* 259:R333–10.  
616 <https://doi.org/10.1111/1365-2435.13375>
- 617 Smit B, McKechnie AE (2010) Avian seasonal metabolic variation in a subtropical desert:

- 618 basal metabolic rates are lower in winter than in summer. *Funct Ecol* 24:330–339.  
619 <https://doi.org/10.1111/j.1365-2435.2009.01646.x>
- 620 Soriano PJ, Ruiz A, Arends A (2002) Physiological responses to ambient temperature  
621 manipulation by three species of bats from Andean cloud forests. *J Mammal* 83:445–445.  
622 [https://doi.org/10.1644/1545-1542\(2002\)083<0445:PRTATM>2.0.CO;2](https://doi.org/10.1644/1545-1542(2002)083<0445:PRTATM>2.0.CO;2)
- 623 Steiger SS, Kelley JP, Cochran WW, Wikelski M (2009) Low metabolism and inactive  
624 lifestyle of a tropical rain forest bird investigated via heart-rate telemetry. *Phys Bioch Zool*  
625 82:580–589. <https://doi.org/10.1086/605336>
- 626 Swanson DL (1990) Seasonal variation of vascular oxygen transport in the Dark-eyed Junco.  
627 *Condor* 92:62–66. <https://doi.org/10.2307/1368383>
- 628 Swanson DL (2010) Seasonal metabolic variation in birds: functional and mechanistic  
629 correlates. In: *Current Ornithology Volume 17*, pp. 75–129. Springer New York, New York,  
630 NY.
- 631 Swanson DL, Garland T (2009) The evolution of high summit metabolism and cold tolerance  
632 in birds and its impact on present-day distributions. *Evolution* 63:184–194.  
633 <https://doi.org/10.1111/j.1558-5646.2008.00522.x>
- 634 Vágási CI, Vincze O, Pătraș L, Osváth G, Péntes J, Haussmann MF, Barta Z, Pap PL (2018)  
635 Longevity and life history coevolve with oxidative stress in birds. *Funct Ecol* 33:152–161.  
636 <https://doi.org/10.1111/1365-2435.13228>
- 637 Voelker G, Bowie RCK, Klicka J (2013) Gene trees, species trees and Earth history combine  
638 to shed light on the evolution of migration in a model avian system. *Molec Ecol* 22:3333–  
639 3344. <https://doi.org/10.1111/mec.12305>
- 640 Wells ME, Schaeffer PJ (2012) Seasonality of peak metabolic rate in non-migrant tropical  
641 birds. *J Avian Biol* 43:481–485. <https://doi.org/10.1111/j.1600-048X.2012.05709.x>

- 642 White CR, Blackburn TM, Martin GR, Butler PJ (2007) Basal metabolic rate of birds is  
643 associated with habitat temperature and precipitation, not primary productivity. *Proc Roy Soc*  
644 *B- Biol Sci* 274:287–293. <https://doi.org/10.1098/rspb.2006.3727>
- 645 Wiens JJ, Ackerly DD, Allen AP, Anacker BL, Buckley LB, Cornell HV, Damschen EI,  
646 Jonathan Davies, T., Grytnes J-A, Harrison SP, Hawkins BA, Holt RD, McCain CM,  
647 Stephens PR (2010) Niche conservatism as an emerging principle in ecology and  
648 conservation biology. *Ecol Lett* 13:1310–1324. [https://doi.org/10.1111/j.1461-](https://doi.org/10.1111/j.1461-0248.2010.01515.x)  
649 [0248.2010.01515.x](https://doi.org/10.1111/j.1461-0248.2010.01515.x)
- 650 Wiersma P, Muñoz-Garcia A, Walker A, Williams JB (2007) Tropical birds have a slow pace  
651 of life. *P Natl A Sci USA* 104:9340–5. <https://doi.org/10.1073/pnas.0702212104>
- 652 Williams JB, Miller RA, Harper JM & Wiersma P (2010) Functional linkages for the pace of  
653 life, life-history, and environment in birds. *Integr Comp Biol* 50:855–868.  
654 <https://doi.org/10.1093/icb/icq024>
- 655 Williams TD, Challenge WO, Christians JK, Evanson M, Love O, Vezina F (2004) What  
656 causes the decrease in haematocrit during egg production? *Funct Ecol* 18:330–336.  
657 <https://doi.org/10.1111/j.0269-8463.2004.00829.x>
- 658 Wolfe JD, Ryder TB, Pyle P (2010) Using molt cycles to categorize the age of tropical birds:  
659 an integrative new system. *J Field Ornithol* 81:186–194. [https://doi.org/10.1111/j.1557-](https://doi.org/10.1111/j.1557-9263.2010.00276.x)  
660 [9263.2010.00276.x](https://doi.org/10.1111/j.1557-9263.2010.00276.x)

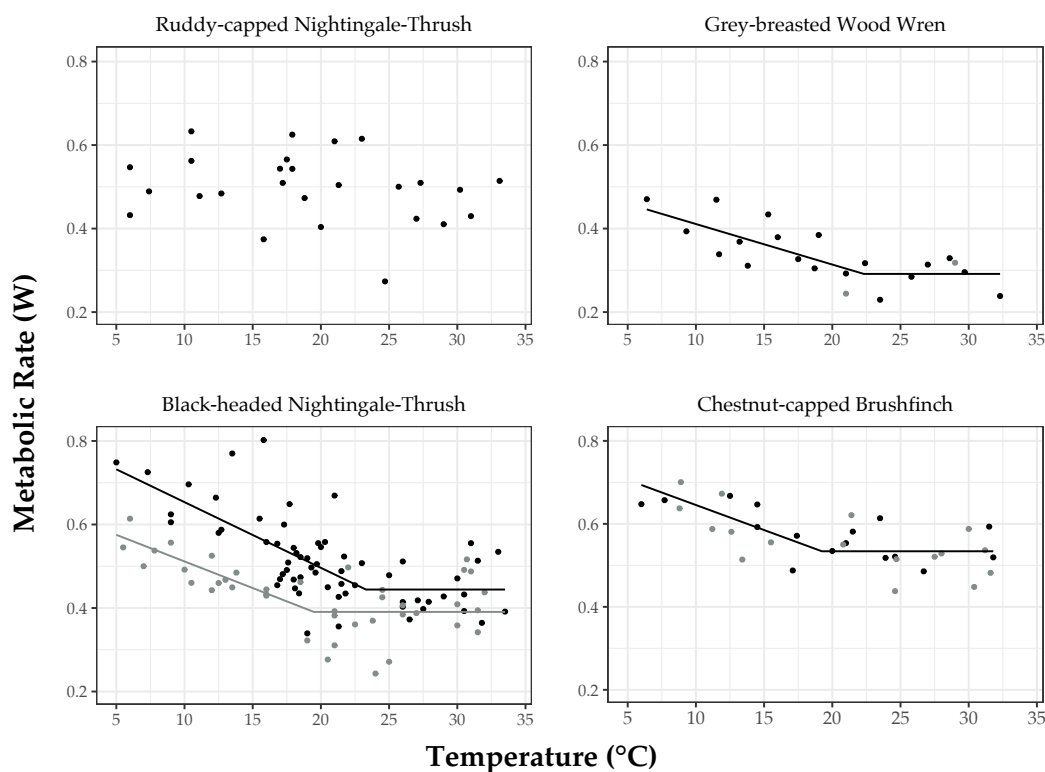

661

662 **Fig.** Error! No text of specified style in document.. Metabolic rate (W) as a function of  
663 temperature (°C) for four species of cloud-forest songbirds. Data points are temperature trials  
664 and fitted lines are non-linear mixed model fits estimating the inflection temperature at which  
665 thermoregulation began ( $T_{lc}$ ), minimum thermal conductance ( $C_{min}$ ) and metabolic rates above  
666 the inflection temperature (BMR). Summer (black) and winter (grey) data are plotted  
667 separately, but summer and winter model fits are separated for black-headed nightingale-  
668 thrushes *Catharus mexicanus*. No effect of temperature was apparent for ruddy-capped  
669 nightingale-thrushes *Catharus frantzii* (top left panel).

670

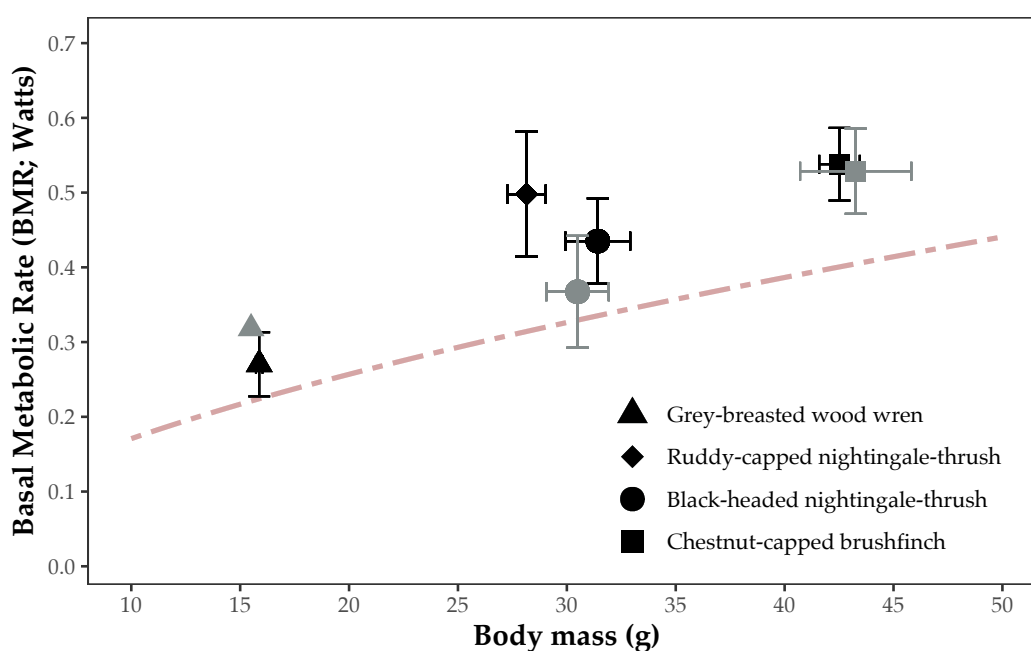

671

672 **Fig. 2.** Mean ( $\pm$  SD) basal metabolic rate (BMR; W) and body mass ( $M_b$ ; g) per species  
673 between summer (black) and winter (grey). Although the only significant difference in  
674 metabolic rates between season was in black-headed nightingale-thrushes *Catharus*  
675 *mexicanus*, we plot all data separately for purposes of visual comparison. Expected allometric  
676 scaling relationship between basal metabolic rate and body mass for tropical birds (red dashed  
677 line) is taken from Londoño *et al.* (2015).

678



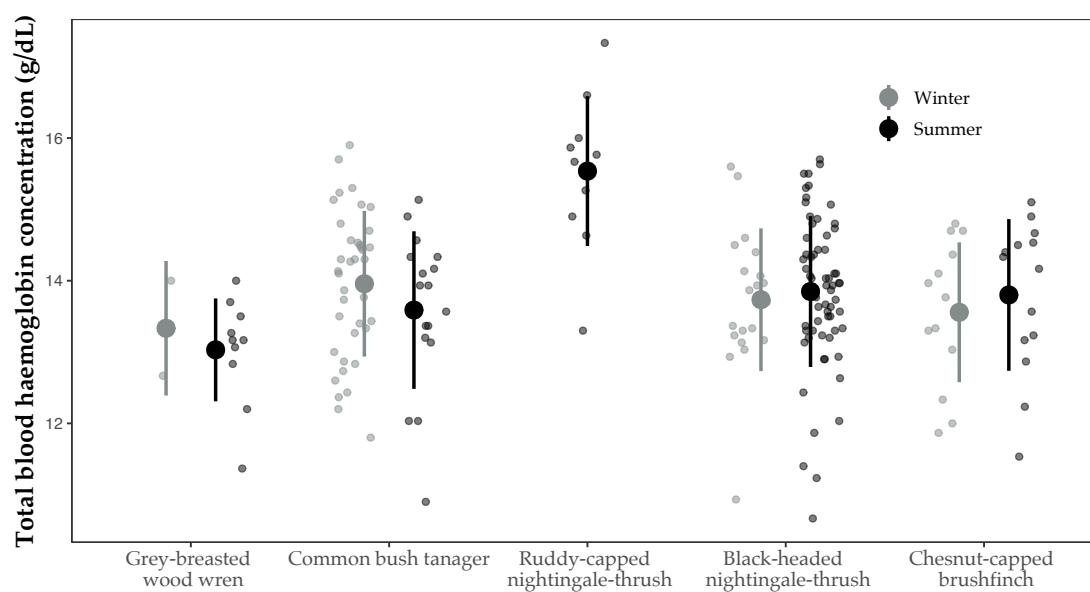

679

680 **Fig. 3.** Haemoglobin concentrations (g/dL, mean  $\pm$  SD) between species and between season.

681 No winter data were available for ruddy-capped nightingale-thrushes *Catharus frantzii* (see

682 Methods and Materials).

683

684 **Table** Error! No text of specified style in document.. Seasonal comparisons of body mass (g),  
 685 basal metabolic rate (BMR, whole animal (W) and mass-corrected (mW g<sup>-1</sup>)), and total blood  
 686 haemoglobin content (g/dL) per species. Sample sizes (number of unique individuals) are  
 687 presented in parentheses. Statistically significant differences between seasons are denoted  
 688 with an asterisk. Note, samples sizes for BMR are a subset of the full dataset displayed in Fig.  
 689 1, where BMR is taken only from measurements greater than the lower critical temperature.

|                                                                 | Winter              | Summer              | W / S ratio |
|-----------------------------------------------------------------|---------------------|---------------------|-------------|
| <b>Black-headed nightingale-thrush</b> <i>Catharus mexcanus</i> |                     |                     |             |
| Body Mass (g)                                                   | 30.40 ± 1.28 (20)   | 31.04 ± 1.45 (64)   | 0.98        |
| Whole-animal BMR (W)                                            | 0.36 ± 0.07 (14) *  | 0.43 ± 0.05 (15) *  | 0.83        |
| Mass-specific BMR (mW g <sup>-1</sup> )                         | 12.02 ± 2.28 (14) * | 13.88 ± 1.95 (15) * | 0.87        |
| Total blood haemoglobin (g/dL)                                  | 13.73 ± 1.00 (20)   | 13.85 ± 1.06 (62)   | 0.99        |
| <b>Ruddy-capped nightingale-thrush</b> <i>Catharus frantzii</i> |                     |                     |             |
| Body Mass (g)                                                   | -                   | 28.22 ± 0.95 (11)   | -           |
| Whole-animal BMR (W)                                            | -                   | 0.47 ± 0.09 (11)    | -           |
| Mass-specific BMR (mW g <sup>-1</sup> )                         | -                   | 16.77 ± 3.50 (11)   | -           |
| Total blood haemoglobin (g/dL)                                  | -                   | 15.53 ± 1.05 (11)   | -           |
| <b>Chestnut-capped brushfinch</b> <i>Arremon brunneinucha</i>   |                     |                     |             |
| Body Mass (g)                                                   | 42.75 ± 2.17 (14)   | 42.32 ± 1.55 (13)   | 1.01        |
| Whole-animal BMR (W)                                            | 0.52 ± 0.05 (8)     | 0.53 ± 0.04 (5)     | 0.98        |
| Mass-specific BMR (mW g <sup>-1</sup> )                         | 12.24 ± 1.46 (8)    | 12.64 ± 1.05 (5)    | 0.96        |
| Total blood haemoglobin (g/dL)                                  | 13.55 ± 0.98 (14)   | 13.8 ± 1.06 (13)    | 0.99        |
| <b>Grey-breasted wood wren</b> <i>Henicorhina leucophrys</i>    |                     |                     |             |
| Body Mass (g)                                                   | 15.35 ± 0.21 (2) *  | 15.97 ± 0.60 (12) * | 0.96        |
| Whole-animal BMR (W)                                            | 0.31 (1)            | 0.27 ± 0.04 (4)     | 1.14        |
| Mass-specific BMR (mW g <sup>-1</sup> )                         | 20.53 (1)           | 17.03 ± 2.78 (4)    | 1.2         |
| Total blood haemoglobin (g/dL)                                  | 13.33 ± 0.94 (2)    | 13.03 ± 0.72 (11)   | 1.02        |
| <b>Common bush tanager</b> <i>Chlorospingus flavopectus</i>     |                     |                     |             |
| Body Mass (g)                                                   | 15.8 ± 0.89 (38) *  | 16.85 ± 0.45 (17) * | 0.93        |
| Total blood haemoglobin (g/dL)                                  | 13.95 ± 1.02 (38)   | 13.59 ± 1.05 (17)   | 1.02        |

690
